# Supplementary material for: Ultra-high resolution 17O solid-state NMR spectroscopy of biomolecules: A comprehensive spectral analysis of monosodium L-glutamate·monohydrate
Source: Royal Society of Chemistry journal article supplement (doi:10.1039/c1cp20629j), 2011-01-01
Supplement: c1cp20629j.pdf [file c1cp20629j.pdf]

# Ultra-High Resolution $^{17}\text{O}$ Solid-State NMR Spectroscopy of Biomolecules: A Comprehensive Spectral Analysis of Monosodium L-Glutamate Monohydrate

## Supplementary Materials

Alan Wong,<sup>†,φ,\*</sup> Andy P. Howes,<sup>†</sup> Jonathan R. Yates,<sup>‡</sup> Anthony Watts,<sup>§</sup> Tiit Anupõld,<sup>¶</sup> Jaan Past,<sup>¶</sup> Ago Samoson,<sup>¶,†</sup> Ray Dupree,<sup>†,\*</sup> Mark E. Smith<sup>†,\*</sup>

<sup>†</sup>Department of Physics, University of Warwick, Coventry, CV4 7AL, United Kingdom

<sup>φ</sup>CEA Saclay, DSM, IRAMIS, UMR CEA/CNRS no 3299 – SIS2M, Laboratoire Structure et Dynamique par Résonance Magnétique, F-91191, Gif-sur-Yvette Cedex, France

<sup>‡</sup>University of Oxford, Department of Materials, Parks Road, Oxford, OX1 3PH, United Kingdom

<sup>§</sup>Biochemistry Department, University of Oxford, South Parks Road, Oxford, OX1 3QU, United Kingdom

<sup>¶</sup>National Institute for Chemical Physics and Biophysics, Akadeemia Tee 23, Tallinn, Estonia

---

φ present address: CEA Saclay.

Authors for correspondence:

Mark E. Smith, University of Warwick, E-mail: [M.E.Smith.1@warwick.ac.uk](mailto:M.E.Smith.1@warwick.ac.uk); Tel: +44 (0)2476 522380; Fax: +44 (0)2476 150897

Alan Wong, CEA Saclay, E-mail: [alan.wong@cea.fr](mailto:alan.wong@cea.fr); Tel: +33 (0)1 69 08 41 05; Fax: +33 (0)1 69 08 98 06

Ray Dupree, University of Warwick, Email [R.Dupree@warwick.ac.uk](mailto:R.Dupree@warwick.ac.uk); Tel: +44 (0)2476 523403

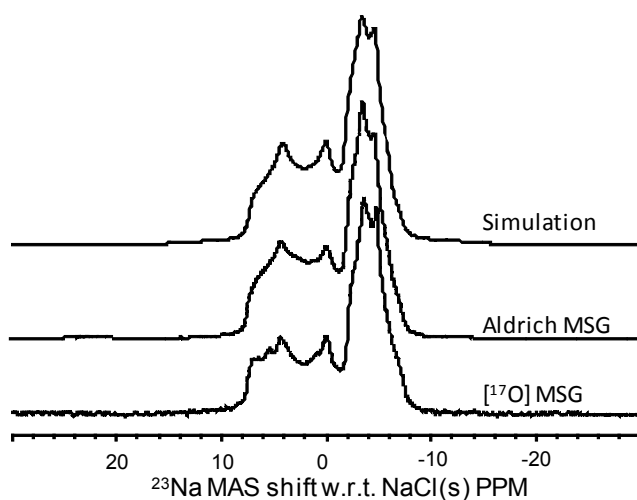

**Figure S1.**  $^{23}\text{Na}$  MAS spectra of MSG. All spectra were acquired on a Bruker Avance II<sup>+</sup> 600 with a Bruker 4-mm MAS probe, spinning at a 12500 Hz frequency. The Aldrich MSG sample was purchase from Sigma-Aldrich without purification. [ $^{17}\text{O}$ ] MSG is the same sample used for the  $^{17}\text{O}$  NMR study. The following  $^{17}\text{O}$  NMR parameters were used to simulate the MAS spectrum,

Experimental results (MAS simulation):

Na1  $\chi_q = 2.42(2)$  MHz,  $\eta_q = 0.39(4)$ ,  $\delta_{\text{iso}} = 8.00(5)$  ppm

Na2  $\chi_q = 1.47(2)$  MHz,  $\eta_q = 0.49(4)$ ,  $\delta_{\text{iso}} = -1.84 (5)$  ppm

DFT results (from a fully optimised mode)

Na1  $\chi_q = -2.53$  MHz,  $\eta_q = 0.30$ ,  $\delta_{\text{iso}} = 9.75$  ppm

Na2  $\chi_q = 1.85$  MHz,  $\eta_q = 0.42(4)$ ,  $\delta_{\text{iso}} = -2.00$  ppm.

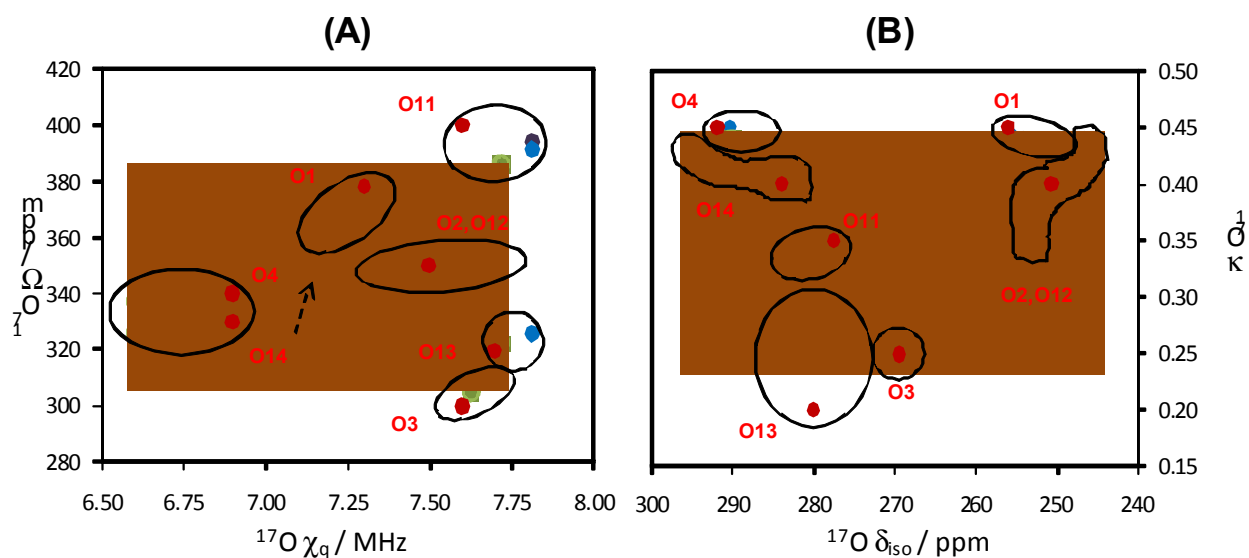

**Figure S2.** (A) A 2D NMR parameters comparison between  $\Omega$  vs  $\chi_q$  and (B)  $\kappa$  vs  $\delta_{iso}$ . For all the plots, the experimental NMR data are represented by solid red circles; fully optimised model by solid purple; O,H-optimised by solid blue; H-optimised by transparent green; and X-ray structure by transparent brown. The DFT  $\Omega$  and  $\chi_q$  values are scaled by 0.76 and 0.93, respectively. Refer to Table 3 (in text) for the original un-scaled DFT values and to Table 2 (in text) for the experimental NMR data. The 2D comparison displayed here are similar to Figures 5C and 5D in text, in such that the experimental values and the DFT results are clustered together aiding the site assignments,

**Table S1.**  $^1\text{H}$  and  $^{13}\text{C}$  NMR results of MSG: DFT<sup>a</sup> and experiment.

| H site           | DFT $^1\text{H}$ $\delta_{\text{iso}}$ (O,H-optimised)<br>Ppm    | DFT $^1\text{H}$ $\delta_{\text{iso}}$ (X-ray)<br>ppm    | Experimental $^1\text{H}$ $\delta_{\text{iso}}$<br>$\pm 0.1$ ppm    |
|------------------|------------------------------------------------------------------|----------------------------------------------------------|---------------------------------------------------------------------|
| CH               | 6.48                                                             | 6.18                                                     | 6.3                                                                 |
| CH               | 5.32                                                             | 4.88                                                     | 5.0                                                                 |
| CH <sub>2</sub>  | 2.64                                                             | 2.34                                                     | 2.0                                                                 |
| CH <sub>2</sub>  | 2.09                                                             | 2.07                                                     | –                                                                   |
| CH <sub>2</sub>  | 1.71                                                             | 1.60                                                     | –                                                                   |
| CH <sub>2</sub>  | 2.00                                                             | 1.84                                                     | –                                                                   |
| CH <sub>2</sub>  | 2.10                                                             | 1.80                                                     | –                                                                   |
| CH <sub>2</sub>  | 2.01                                                             | 1.73                                                     | –                                                                   |
| CH <sub>2</sub>  | 1.41                                                             | 0.38                                                     | –                                                                   |
| CH <sub>2</sub>  | 1.25                                                             | 0.68                                                     | –                                                                   |
| NH <sub>3</sub>  | 9.43                                                             | 10.58                                                    | –                                                                   |
| NH <sub>3</sub>  | 7.77                                                             | 8.68                                                     | –                                                                   |
| NH <sub>3</sub>  | 8.01 (8.40) <sup>b</sup>                                         | 9.37 (9.54) <sup>b</sup>                                 | 8.5                                                                 |
| NH <sub>3</sub>  | 7.46                                                             | 8.41                                                     | –                                                                   |
| NH <sub>3</sub>  | 10.21                                                            | 11.04                                                    | –                                                                   |
| NH <sub>3</sub>  | 6.77 (8.15) <sup>b</sup>                                         | 8.30 (9.25) <sup>b</sup>                                 | 8.2                                                                 |
| H <sub>2</sub> O | 5.74                                                             | 1.98                                                     | 5.0                                                                 |
| H <sub>2</sub> O | 5.69                                                             | -5.69                                                    | –                                                                   |
| H <sub>2</sub> O | 4.79                                                             | 1.28                                                     | –                                                                   |
| H <sub>2</sub> O | 5.03                                                             | -3.41                                                    | –                                                                   |
| C site           | DFT $^{13}\text{C}$ $\delta_{\text{iso}}$ (O,H-optimised)<br>Ppm | DFT $^{13}\text{C}$ $\delta_{\text{iso}}$ (X-ray)<br>ppm | Experimental $^{13}\text{C}$ $\delta_{\text{iso}}$<br>$\pm 0.2$ ppm |
| CO               | 180.28                                                           | 175.97                                                   | 176.1                                                               |
| CO               | 181.31                                                           | 178.36                                                   | 176.1                                                               |
| CO               | 186.89                                                           | 184.56                                                   | 180.8                                                               |
| CO               | 188.43                                                           | 184.79                                                   | 182.5                                                               |
| CN               | 57.27                                                            | 56.83                                                    | 55.2                                                                |
| CN               | 55.23                                                            | 55.20                                                    | 54.0                                                                |
| CH <sub>2</sub>  | 27.58                                                            | 27.44                                                    | 27.5                                                                |
| CH <sub>2</sub>  | 38.37                                                            | 38.38                                                    | 39.2                                                                |
| CH <sub>2</sub>  | 29.54                                                            | 28.89                                                    | 27.5                                                                |
| CH <sub>2</sub>  | 36.38                                                            | 31.71                                                    | 35.0                                                                |

(a)  $\delta_{\text{iso}} = \sigma_{\text{ref}} - \sigma_{\text{iso}}$ , where  $\sigma_{\text{ref}}(^1\text{H}) = 30.70$  ppm and  $\sigma_{\text{ref}}(^{13}\text{C}) = 169.80$  ppm.

(b) The parentheses indicate the average shift for NH<sub>3</sub>.

**Table S2.** DFT results of the  $^{17}\text{O}$  tensor components.

| O site                 | $\delta_{11}$<br>ppm | $\delta_{22}$<br>ppm | $\delta_{33}$<br>ppm | $\chi_{xx}$<br>MHz | $\chi_{yy}$<br>MHz | $\chi_{zz}$<br>MHz | $\angle\text{C-O-}\delta_{22}$<br>$^\circ$ | $\angle\text{C-O-}\chi_{yy}$<br>$^\circ$ |
|------------------------|----------------------|----------------------|----------------------|--------------------|--------------------|--------------------|--------------------------------------------|------------------------------------------|
| <u>Fully optimised</u> |                      |                      |                      |                    |                    |                    |                                            |                                          |
| O1                     | 463.8                | 325.9                | -26.9                | -2.2               | -5.7               | 7.9                | 143.6                                      | 178.7                                    |
| O11                    | 514.3                | 339.6                | -4.4                 | -2.6               | -5.8               | 8.4                | 139.3                                      | 177.6                                    |
| O2                     | 443.6                | 314.1                | -17.9                | -1.9               | -6.1               | 8.0                | 147.7                                      | 178.5                                    |
| O12                    | 454.1                | 312.7                | -7.7                 | -2.1               | -6.2               | 8.3                | 147.1                                      | 177.3                                    |
| O3                     | 455.8                | 302.4                | 47.5                 | -2.0               | -6.3               | 8.3                | 144.5                                      | 177.4                                    |
| O13                    | 473.7                | 313.7                | 46.9                 | -2.2               | -6.1               | 8.3                | 143.2                                      | 177.6                                    |
| O4                     | 481.2                | 355.0                | 31.1                 | -1.5               | -5.6               | 7.1                | 147.0                                      | 177.8                                    |
| O14                    | 475.0                | 341.5                | 31.2                 | -1.4               | -5.7               | 7.1                | 145.5                                      | 177.2                                    |
| <u>O,H-optimised</u>   |                      |                      |                      |                    |                    |                    |                                            |                                          |
| O1                     | 462.8                | 326.4                | -23.3                | -2.2               | -5.7               | 7.9                | 143.0                                      | 177.8                                    |
| O11                    | 508.7                | 336.6                | -6.0                 | -2.6               | -5.8               | 8.4                | 137.9                                      | 177.8                                    |
| O2                     | 449.1                | 316.7                | -16.2                | -2.0               | -6.1               | 8.0                | 146.1                                      | 177.7                                    |
| O12                    | 454.2                | 315.6                | -6.0                 | -2.1               | -6.2               | 8.3                | 146.7                                      | 176.7                                    |
| O3                     | 457.7                | 305.9                | 47.8                 | -2.1               | -6.3               | 8.3                | 144.3                                      | 177.2                                    |
| O13                    | 475.0                | 317.4                | 46.3                 | -2.2               | -6.1               | 8.4                | 146.8                                      | 177.7                                    |
| O4                     | 482.8                | 357.6                | 30.8                 | -1.6               | -5.6               | 7.2                | 146.2                                      | 177.7                                    |
| O14                    | 470.8                | 342.7                | 35.0                 | -1.3               | -5.8               | 7.1                | 147.4                                      | 177.9                                    |

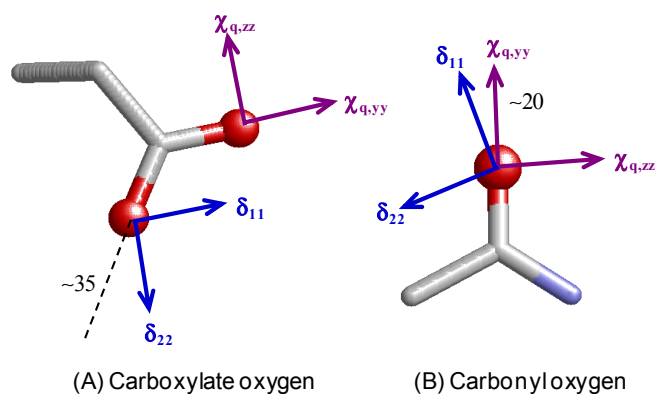

**Figure S3.** A diagram showing the  $^{17}\text{O}$  CS and EFG tensor orientations in the molecular frame of carboxylate and carbonyl oxygens.

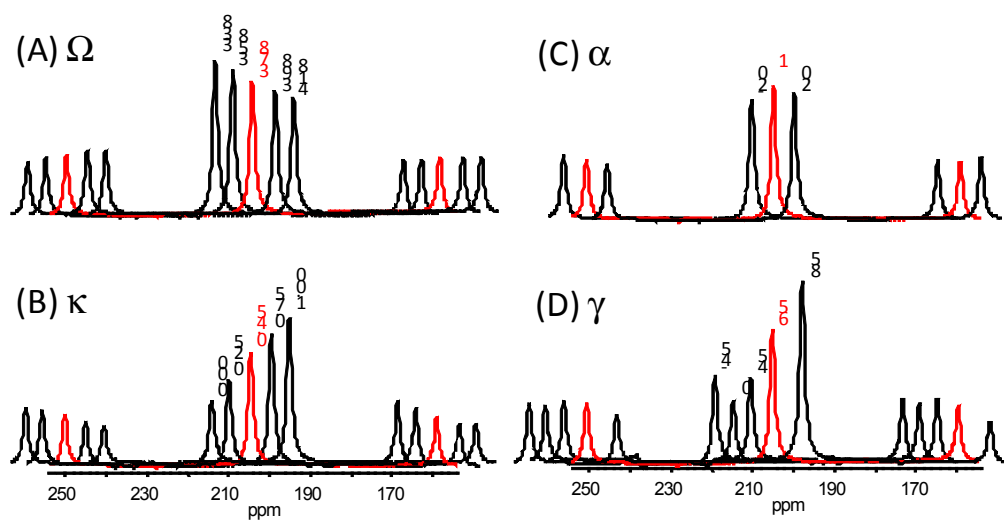

**Figure S4.** Simulated  $^{17}\text{O}$  DOR spectra of P2 at 14.1 T (values can be found in Table 2 in text) by varying the following parameters:  $\Omega$ ,  $\kappa$ ,  $\alpha$  and  $\gamma$ . The red spectrum represents the result shown in Figure 4.
